# Supplementary material
Source: publisher site journal article supplement (https://www.dovepress.com/get_supplementary_file.php?f=350879.docx)
Supplement: Supplementary file 1 [file get_supplementary_file.php]

Supplemental Table 1. The results of assessing Adverse Drug Reaction Probability Scale of Case 1

|  | Yes | No | Do Not Know | Score |
| --- | --- | --- | --- | --- |
| 1. Are there previous conclusive reports on this reaction? | +1 | 0 | 0 | 0 |
| 2. Did the adverse event appear after the suspected drug was administered? | +2 | -1 | 0 | 2 |
| 3. Did the adverse reaction improve when the drug was discontinued or a specific antagonist was administered? | +1 | 0 | 0 | 0 |
| 4. Did the adverse event reappear when the drug was re-administered? | +2 | -1 | 0 | 0 |
| 5. Are there alternative causes (other than the drug) that could on their own have caused the reaction? | -1 | +2 | 0 | 2 |
| 6. Did the reaction reappear when a placebo was given? | -1 | +1 | 0 | 0 |
| 7. Was the drug detected in blood (or other fluids) in concentrations known to be toxic? | +1 | 0 | 0 | 0 |
| 8. Was the reaction more severe when the dose was increased or less severe when the dose was decreased? | +1 | 0 | 0 | 0 |
| 9. Did the patient have a similar reaction to the same or similar drugs in any previous exposure? | +1 | 0 | 0 | 0 |
| 10. Was the adverse event confirmed by any objective evidence? | +1 | 0 | 0 | 1 |
|  | TOTAL SCORE | | | 5 |

Supplemental Table 1. The results of assessing Adverse Drug Reaction Probability Scale of Case 2

|  | Yes | No | Do Not Know | Score |
| --- | --- | --- | --- | --- |
| 1. Are there previous conclusive reports on this reaction? | +1 | 0 | 0 | 0 |
| 2. Did the adverse event appear after the suspected drug was administered? | +2 | -1 | 0 | 2 |
| 3. Did the adverse reaction improve when the drug was discontinued or a specific antagonist was administered? | +1 | 0 | 0 | 1 |
| 4. Did the adverse event reappear when the drug was re-administered? | +2 | -1 | 0 | 0 |
| 5. Are there alternative causes (other than the drug) that could on their own have caused the reaction? | -1 | +2 | 0 | 2 |
| 6. Did the reaction reappear when a placebo was given? | -1 | +1 | 0 | 0 |
| 7. Was the drug detected in blood (or other fluids) in concentrations known to be toxic? | +1 | 0 | 0 | 0 |
| 8. Was the reaction more severe when the dose was increased or less severe when the dose was decreased? | +1 | 0 | 0 | 0 |
| 9. Did the patient have a similar reaction to the same or similar drugs in any previous exposure? | +1 | 0 | 0 | 0 |
| 10. Was the adverse event confirmed by any objective evidence? | +1 | 0 | 0 | 1 |
|  | TOTAL SCORE | | | 6 |
